# Supplementary material for: Photoenhancement of lifetimes in CdSe/ZnS and CdTe quantum dot-dopamine conjugates
Source: Royal Society of Chemistry journal article supplement (doi:10.1039/b820602c), 2009-01-01
Supplement: b820602c.pdf [file b820602c.pdf]

| CdSeZnS | A <sub>1</sub> | τ <sub>1</sub> | β     | A <sub>2</sub> | τ <sub>2</sub> | bgrnd (cnts) | χ <sup>2</sup> |
|---------|----------------|----------------|-------|----------------|----------------|--------------|----------------|
| 0       | 7341.5         | 1.151          | 0.507 | 8134.9         | 0.028          | 2.8          | 0.942          |
| 1       | 9361.6         | 0.997          | 0.493 | 11970.3        | 0.028          | 2.9          | 0.981          |
| 2       | 10569.3        | 0.849          | 0.482 | 12406.3        | 0.046          | 3.4          | 1.074          |
| 3       | 10496.4        | 0.761          | 0.473 | 14028          | 0.03           | 3            | 1.118          |
| 4       | 9873.8         | 0.764          | 0.476 | 13356.4        | 0.034          | 2.8          | 1.042          |
| 5       | 9562.8         | 0.729          | 0.472 | 12273.4        | 0.036          | 2.8          | 1.035          |
| 6       | 9936.1         | 0.651          | 0.461 | 12616.8        | 0.035          | 2.6          | 1.037          |
| 7       | 9650.7         | 0.67           | 0.465 | 11210.6        | 0.043          | 2.5          | 1.095          |
| 8       | 9688.7         | 0.674          | 0.464 | 13626.8        | 0.029          | 2.6          | 1.024          |
| 9       | 9601.3         | 0.726          | 0.468 | 15428.5        | 0.001          | 3.1          | 1.007          |
| 10      | 9086           | 0.709          | 0.469 | 12761.3        | 0.031          | 2.7          | 1.029          |
| 11      | 9505.7         | 0.653          | 0.49  | 12597.8        | 0.035          | 2.7          | 0.973          |
| 12      | 10146.9        | 0.574          | 0.447 | 13379.9        | 0.025          | 1.8          | 1.033          |
| 13      | 8982.9         | 0.661          | 0.462 | 12589.9        | 0.023          | 2.3          | 0.974          |
| 14      | 8880.8         | 0.662          | 0.462 | 13004.8        | 0.022          | 2.4          | 0.99           |
| 15      | 8931.8         | 0.61           | 0.454 | 12590.9        | 0.017          | 1.9          | 0.982          |
| 16      | 8439.8         | 0.664          | 0.464 | 12233          | 0.027          | 2.4          | 1.046          |
| 17      | 8421.8         | 0.647          | 0.461 | 11776.2        | 0.029          | 2.3          | 1.033          |
| 18      | 8322.6         | 0.648          | 0.461 | 12202.6        | 0.026          | 2.2          | 0.983          |
| 19      | 8089.6         | 0.664          | 0.464 | 10933.2        | 0.029          | 2.2          | 0.961          |

| CdSeZnS-BME | A <sub>1</sub> | τ <sub>1</sub> | β     | A <sub>2</sub> | τ <sub>2</sub> | bgrnd (cnts) | χ <sup>2</sup> |
|-------------|----------------|----------------|-------|----------------|----------------|--------------|----------------|
| 0           | 15877.4        | 0.489          | 0.463 | 23359.6        | 0.063          | 5            | 1.163          |
| 1           | 9909.9         | 0.52           | 0.456 | 20725.1        | 0.057          | 3.4          | 1.132          |
| 2           | 10130.4        | 0.576          | 0.474 | 19439.6        | 0.053          | 3.2          | 1.173          |
| 3           | 11096          | 0.545          | 0.473 | 19618          | 0.059          | 3.8          | 1.168          |
| 4           | 10322.5        | 0.504          | 0.46  | 20510.6        | 0.056          | 3.2          | 1.15           |
| 5           | 9654.9         | 0.542          | 0.463 | 19699.5        | 0.064          | 3.7          | 1.084          |
| 6           | 9390.1         | 0.511          | 0.451 | 20228.6        | 0.067          | 3.1          | 1.215          |
| 7           | 8918.6         | 0.679          | 0.474 | 20059.8        | 0.075          | 4.1          | 1.166          |
| 8           | 8519.8         | 0.735          | 0.482 | 19661.8        | 0.079          | 4.5          | 1.198          |
| 9           | 9570.7         | 0.72           | 0.474 | 20158.8        | 0.077          | 4.2          | 1.347          |
| 10          | 9545.8         | 0.788          | 0.483 | 21657.6        | 0.077          | 4.7          | 1.214          |
| 11          | 9639.5         | 0.81           | 0.485 | 22676.2        | 0.076          | 5            | 1.235          |
| 12          | 9809.9         | 0.875          | 0.493 | 23099.9        | 0.079          | 5.9          | 1.243          |
| 13          | 9219.5         | 0.787          | 0.483 | 22068.8        | 0.076          | 4.9          | 1.271          |
| 14          | 9950.6         | 0.8            | 0.482 | 21610.2        | 0.08           | 5            | 1.207          |
| 15          | 10281.9        | 0.794          | 0.479 | 23631.9        | 0.071          | 4.9          | 1.168          |
| 16          | 10996.6        | 0.844          | 0.481 | 23356.5        | 0.078          | 5.1          | 1.245          |
| 17          | 12029.8        | 0.835          | 0.478 | 23899.8        | 0.079          | 5.8          | 1.279          |
| 18          | 11284.9        | 0.836          | 0.488 | 24602.5        | 0.08           | 6.6          | 1.223          |
| 19          | 11069.4        | 0.824          | 0.479 | 23419.8        | 0.077          | 5.4          | 1.256          |

| CdSeZnS-<br>HighDA | $A_1$  | $\tau_1$ | $\beta$ | $A_2$  | $\tau_2$ | bgrnd (cnts) | $\chi^2$ |
|--------------------|--------|----------|---------|--------|----------|--------------|----------|
| 0                  | 3275.8 | 1.253    | 0.47    | 7561.7 | 0.051    | 0.7          | 0.906    |
| 1                  | 3485.8 | 1.738    | 0.496   | 7481.1 | 0.056    | 0.9          | 0.852    |
| 2                  | 4030   | 2.823    | 0.542   | 6697   | 0.077    | 0.7          | 0.909    |
| 3                  | 4742.4 | 3.432    | 0.568   | 7452.7 | 0.075    | 1.1          | 0.906    |
| 4                  | 5000.6 | 4.755    | 0.612   | 6829.6 | 0.086    | 1.4          | 0.972    |
| 5                  | 4784.7 | 4.728    | 0.61    | 6800.2 | 0.079    | 1.2          | 1        |
| 6                  | 4255.4 | 5.734    | 0.64    | 4884.9 | 0.092    | 1.3          | 0.988    |
| 7                  | 3773.2 | 6.295    | 0.655   | 3948   | 0.093    | 1.3          | 0.94     |
| 8                  | 3518.5 | 6.188    | 0.651   | 4534.9 | 0.073    | 1.1          | 0.947    |
| 9                  | 2981.8 | 6.975    | 0.675   | 2934.1 | 0.094    | 1.3          | 0.923    |
| 10                 | 3072   | 6.842    | 0.668   | 3006   | 0.096    | 1.3          | 0.949    |
| 11                 | 3075.7 | 6.907    | 0.67    | 3838.2 | 0.069    | 1.2          | 0.944    |
| 12                 | 2702.6 | 7.03     | 0.672   | 2540.7 | 0.086    | 1.1          | 0.918    |
| 13                 | 2989.6 | 6.605    | 0.661   | 2679.7 | 0.113    | 1.2          | 0.941    |
| 14                 | 3090.2 | 6.887    | 0.669   | 3191.7 | 0.085    | 1.4          | 0.941    |
| 15                 | 4032.8 | 6.742    | 0.666   | 4984.1 | 0.085    | 2            | 0.942    |
| 16                 | 3839.6 | 7.133    | 0.674   | 3661.7 | 0.099    | 1.9          | 0.967    |
| 17                 | 3548.2 | 7.366    | 0.679   | 2889.5 | 0.122    | 1.9          | 1.003    |
| 18                 | 3352.1 | 7.62     | 0.687   | 2908.8 | 0.109    | 2            | 1.006    |
| 19                 | 3804.6 | 6.99     | 0.666   | 4261.4 | 0.078    | 1.8          | 0.965    |

| CdSeZnS-LowDA | A <sub>1</sub> | τ <sub>1</sub> | β     | A <sub>2</sub> | τ <sub>2</sub> | bgrnd (cnts) | χ <sup>2</sup> |
|---------------|----------------|----------------|-------|----------------|----------------|--------------|----------------|
| 0             | 3834.5         | 1.339          | 0.478 | 7928.4         | 0.059          | 1.1          | 0.87           |
| 1             | 4350.1         | 2.399          | 0.527 | 7515.6         | 0.074          | 1            | 0.919          |
| 2             | 4661.3         | 3.041          | 0.551 | 7243.4         | 0.084          | 1            | 1.005          |
| 3             | 4867.3         | 4.773          | 0.608 | 7082.1         | 0.074          | 1            | 0.982          |
| 4             | 5195.6         | 3.561          | 0.57  | 8203.7         | 0.068          | 0.9          | 1.048          |
| 5             | 4785.9         | 5.876          | 0.642 | 5560.3         | 0.084          | 1.4          | 0.977          |
| 6             | 5137.2         | 4.687          | 0.605 | 7108.8         | 0.081          | 1.2          | 1.084          |
| 7             | 3149.8         | 6.879          | 0.664 | 2831.1         | 0.107          | 1            | 0.947          |
| 8             | 3459.2         | 6.355          | 0.651 | 4757.3         | 0.067          | 1            | 0.984          |
| 9             | 3588.8         | 5.714          | 0.638 | 4327.7         | 0.095          | 1.2          | 0.99           |
| 10            | 2962.7         | 6.639          | 0.661 | 3081.6         | 0.107          | 1.3          | 0.947          |
| 11            | 2800.2         | 6.829          | 0.667 | 2843.5         | 0.106          | 1.5          | 0.947          |
| 12            | 2858.7         | 6.864          | 0.665 | 3566.7         | 0.077          | 1.2          | 1.012          |
| 13            | 3035.8         | 6.856          | 0.664 | 3071.7         | 0.111          | 1.4          | 0.904          |
| 14            | 3139.5         | 6.846          | 0.662 | 3251.9         | 0.098          | 1.4          | 0.99           |
| 15            | 3477.2         | 6.723          | 0.661 | 3977.6         | 0.098          | 1.9          | 0.977          |
| 16            | 3477           | 7.075          | 0.669 | 4022.4         | 0.084          | 2            | 0.935          |
| 17            | 3319.3         | 7.596          | 0.684 | 4155.9         | 0.075          | 2.2          | 1.032          |
| 18            | 3986.7         | 6.697          | 0.657 | 5172.5         | 0.084          | 2.3          | 0.986          |
| 19            | 4029.9         | 7.486          | 0.68  | 4452.7         | 0.107          | 3            | 0.995          |

| CdSeZnS-DA-BME | A <sub>1</sub> | $\tau_1$ | $\beta$ | A <sub>2</sub> | $\tau_2$ | bgrnd (cnts) | $\chi^2$ |
|----------------|----------------|----------|---------|----------------|----------|--------------|----------|
| 0              | 3007.6         | 1.272    | 0.463   | 9876.5         | 0.06     | 1.6          | 0.888    |
| 1              | 3142.1         | 1.73     | 0.489   | 9847.7         | 0.062    | 1.6          | 0.86     |
| 2              | 3080.2         | 2.25     | 0.516   | 8676.1         | 0.079    | 1.7          | 0.957    |
| 3              | 2980.3         | 2.56     | 0.53    | 8953.5         | 0.08     | 1.6          | 1.06     |
| 4              | 2786.1         | 2.457    | 0.522   | 8441.2         | 0.085    | 1.7          | 0.904    |
| 5              | 2515.6         | 2.391    | 0.518   | 8153           | 0.085    | 1.5          | 0.917    |
| 6              | 2468.7         | 2.203    | 0.506   | 8744           | 0.078    | 1.4          | 0.936    |
| 7              | 2198.1         | 1.942    | 0.494   | 7876.7         | 0.081    | 1.3          | 1.015    |
| 8              | 2002.6         | 1.595    | 0.474   | 7976.8         | 0.072    | 1.4          | 0.954    |
| 9              | 1948.4         | 1.913    | 0.491   | 7939.7         | 0.076    | 1.2          | 0.943    |
| 10             | 1841.3         | 2.023    | 0.497   | 7734.8         | 0.079    | 1.2          | 0.88     |
| 11             | 1738           | 1.19     | 0.444   | 8363.5         | 0.058    | 1.2          | 0.98     |
| 12             | 1787.5         | 0.993    | 0.428   | 8912.1         | 0.045    | 1            | 0.854    |
| 13             | 1685.8         | 1.085    | 0.435   | 7503.1         | 0.061    | 1            | 0.899    |
| 14             | 1634.3         | 1.18     | 0.445   | 7436.5         | 0.065    | 1.1          | 0.894    |
| 15             | 1562.6         | 1.232    | 0.447   | 7373           | 0.062    | 0.9          | 0.925    |
| 16             | 1567.3         | 1.248    | 0.446   | 7204.2         | 0.068    | 0.7          | 0.949    |
| 17             | 1450.9         | 1.329    | 0.456   | 7082           | 0.071    | 0.9          | 0.908    |
| 18             | 1465.6         | 1.021    | 0.43    | 7132.1         | 0.062    | 0.8          | 0.915    |
| 19             | 1487           | 0.924    | 0.423   | 7251.5         | 0.064    | 0.9          | 0.912    |

| CdTe | A     | $\tau$ (ns) | $\beta$ | bgrnd (dec) | $\chi^2$ |
|------|-------|-------------|---------|-------------|----------|
| 0    | 963.3 | 17.568      | 0.842   | 0.3         | 1.847    |
| 1    | 410.7 | 17.8608     | 0.853   | 0.4         | 0.773    |
| 2    | 383.3 | 17.9096     | 0.85    | 0.3         | 0.762    |
| 3    | 324.3 | 18.8856     | 0.874   | 0.4         | 0.795    |
| 4    | 289.3 | 18.2512     | 0.857   | 0.3         | 0.782    |
| 5    | 263.5 | 18.1048     | 0.849   | 0.3         | 0.711    |
| 6    | 246.1 | 19.3736     | 0.884   | 0.4         | 0.704    |
| 7    | 257.1 | 18.788      | 0.871   | 0.3         | 0.708    |
| 8    | 261.5 | 18.544      | 0.867   | 0.3         | 0.736    |
| 9    | 271.2 | 18.6416     | 0.868   | 0.3         | 0.717    |
| 10   | 275.7 | 17.9096     | 0.848   | 0.3         | 0.742    |
| 11   | 247.8 | 18.4952     | 0.857   | 0.3         | 0.726    |
| 12   | 220.4 | 19.3736     | 0.881   | 0.3         | 0.731    |
| 13   | 206.4 | 19.276      | 0.883   | 0.3         | 0.739    |
| 14   | 200.6 | 19.3248     | 0.884   | 0.3         | 0.749    |
| 15   | 187.3 | 18.7392     | 0.871   | 0.3         | 0.75     |
| 16   | 177.7 | 19.1296     | 0.881   | 0.3         | 0.673    |
| 17   | 186.6 | 19.6664     | 0.889   | 0.3         | 0.67     |
| 18   | 180   | 17.9096     | 0.844   | 0.2         | 0.684    |

| CdTe-BME | A     | $\tau$ (ns) | $\beta$ | bgrnd (dec) | $\chi^2$ |
|----------|-------|-------------|---------|-------------|----------|
| 0        | 324.3 | 6.602       | 0.628   | 0.1         | 0.701    |
| 1        | 323.5 | 6.952       | 0.629   | 0.1         | 0.73     |
| 2        | 316.7 | 7.443       | 0.646   | 0.1         | 0.728    |
| 3        | 359   | 7.345       | 0.644   | 0.1         | 0.682    |
| 4        | 386.5 | 7.137       | 0.639   | 0.1         | 0.873    |
| 5        | 411.4 | 6.467       | 0.611   | 0           | 0.781    |
| 6        | 400.7 | 6.694       | 0.623   | 0.1         | 0.699    |
| 7        | 413.7 | 7.087       | 0.643   | 0.2         | 0.794    |
| 8        | 426.8 | 6.8         | 0.628   | 0.1         | 0.728    |
| 9        | 402   | 6.648       | 0.627   | 0.2         | 0.775    |
| 10       | 389.8 | 6.809       | 0.629   | 0.1         | 0.744    |
| 11       | 360.4 | 6.471       | 0.614   | 0           | 0.754    |
| 12       | 381.1 | 6.71        | 0.626   | 0.2         | 0.683    |
| 13       | 368.6 | 6.549       | 0.612   | -0.1        | 0.742    |
| 14       | 337.1 | 7.145       | 0.637   | 0.2         | 0.732    |
| 15       | 300.5 | 7.059       | 0.634   | 0.2         | 0.622    |
| 16       | 264.4 | 7.229       | 0.637   | 0.2         | 0.664    |
| 17       | 311.6 | 7.208       | 0.626   | 0           | 0.762    |
| 18       | 345.5 | 7.2         | 0.63    | 0           | 0.792    |

| CdTe-High DA | A      | $\tau$ (ns) | $\beta$ | bgrnd (dec) | $\chi^2$ |
|--------------|--------|-------------|---------|-------------|----------|
| 0            | 1156   | 0.009       | 0.22    | -1.5        | 0.766    |
| 1            | 1179.2 | 0.015       | 0.228   | -1.5        | 0.738    |
| 2            | 1187.1 | 0.014       | 0.219   | -2.2        | 0.979    |
| 3            | 733.9  | 0.105       | 0.277   | -1.4        | 0.786    |
| 4            | 550    | 0.165       | 0.298   | -1.2        | 0.887    |
| 5            | 412.8  | 0.303       | 0.323   | -1.2        | 0.805    |
| 6            | 283.3  | 1.053       | 0.404   | -0.8        | 0.743    |
| 7            | 223.3  | 1.163       | 0.417   | -0.4        | 0.723    |
| 8            | 230.1  | 1.491       | 0.434   | -0.9        | 0.862    |
| 9            | 185.4  | 3.22        | 0.561   | -0.1        | 0.831    |
| 10           | 186.1  | 2.954       | 0.541   | -0.1        | 0.841    |
| 11           | 200.1  | 2.097       | 0.474   | -0.7        | 0.898    |
| 12           | 149.5  | 3.932       | 0.613   | 0.3         | 0.684    |
| 13           | 133.4  | 4.503       | 0.629   | 0.2         | 0.74     |
| 14           | 134.5  | 4.32        | 0.598   | -0.1        | 0.83     |
| 15           | 137.1  | 5.846       | 0.699   | 0.5         | 0.662    |
| 16           | 132.4  | 4.32        | 0.593   | 0           | 0.761    |
| 17           | 163.4  | 3.645       | 0.576   | 0.2         | 0.75     |
| 18           | 127.6  | 4.754       | 0.616   | 0           | 0.8      |
| 19           | 121.4  | 4.394       | 0.601   | 0.1         | 0.702    |



| CdTe-LowDA | A     | $\tau$ (ns) | $\beta$ | bgrnd (dec) | $\chi^2$ |
|------------|-------|-------------|---------|-------------|----------|
| 0          | 359.7 | 0.246       | 0.321   | -0.7        | 0.749    |
| 1          | 199.8 | 1.531       | 0.452   | -0.4        | 0.771    |
| 2          | 227.9 | 0.966       | 0.407   | -0.6        | 0.784    |
| 3          | 272.1 | 0.994       | 0.414   | -0.5        | 0.83     |
| 4          | 185.9 | 3.596       | 0.596   | 0.3         | 0.747    |
| 5          | 167.5 | 3.304       | 0.55    | 0           | 0.711    |
| 6          | 147.3 | 3.631       | 0.585   | 0.2         | 0.72     |
| 7          | 145.2 | 3.953       | 0.577   | 0           | 0.741    |
| 8          | 128   | 3.958       | 0.585   | 0.1         | 0.833    |
| 9          | 135.3 | 4.29        | 0.603   | 0.2         | 0.62     |
| 10         | 125.3 | 5.053       | 0.62    | 0.2         | 0.697    |
| 11         | 116.4 | 5.104       | 0.624   | 0.2         | 0.722    |
| 12         | 119.3 | 4.778       | 0.622   | 0.3         | 0.68     |
| 13         | 103.2 | 5.148       | 0.642   | 0.3         | 0.667    |
| 14         | 96.3  | 5.559       | 0.681   | 0.4         | 0.728    |
| 15         | 102.2 | 4.334       | 0.596   | 0.2         | 0.73     |
| 16         | 156.9 | 5.382       | 0.66    | 0.4         | 0.65     |
| 17         | 160.1 | 4.566       | 0.584   | 0.1         | 0.728    |
| 18         | 108   | 4.79        | 0.606   | 0.2         | 0.725    |
| 19         | 14.3  | 4.972       | 0.616   | 0.1         | 0.733    |

| CdTe-<br>HighDABME | A      | $\tau$ (ns) | $\beta$ | bgrnd (dec) | $\chi^2$ |
|--------------------|--------|-------------|---------|-------------|----------|
| 0                  | 1459.8 | 0.099       | 0.295   | -1.2        | 0.925    |
| 1                  | 661.2  | 0.199       | 0.301   | -1.6        | 0.823    |
| 2                  | 339.7  | 1.192       | 0.426   | -0.6        | 0.842    |
| 3                  | 289.4  | 2.23        | 0.495   | -0.2        | 0.842    |
| 4                  | 252.6  | 3.489       | 0.556   | -0.2        | 0.818    |
| 5                  | 244.8  | 2.893       | 0.52    | -0.3        | 0.843    |
| 6                  | 198.8  | 4.431       | 0.613   | 0.2         | 0.76     |
| 7                  | 191.8  | 3.35        | 0.549   | -0.1        | 0.743    |
| 8                  | 190.9  | 5.086       | 0.635   | 0.1         | 0.781    |
| 9                  | 181.2  | 3.18        | 0.525   | -0.3        | 0.751    |
| 10                 | 174.3  | 3.427       | 0.542   | -0.1        | 0.688    |
| 11                 | 150    | 4.946       | 0.623   | 0.2         | 0.759    |
| 12                 | 153.8  | 5.103       | 0.629   | 0.1         | 0.812    |
| 13                 | 165.3  | 3.071       | 0.523   | -0.4        | 0.805    |
| 14                 | 147.9  | 4.295       | 0.596   | 0.1         | 0.704    |
| 15                 | 143.6  | 3.724       | 0.56    | -0.1        | 0.79     |
| 16                 | 128.6  | 5.786       | 0.678   | 0.3         | 0.725    |
| 17                 | 141.7  | 5.26        | 0.649   | 0.2         | 0.684    |
| 18                 | 136.4  | 4.278       | 0.594   | -0.1        | 0.879    |
| 19                 | 151.1  | 2.817       | 0.51    | -0.4        | 0.805    |
